# Supplementary material for: PyMT-Maclow: A novel, inducible, murine model for determining the role of CD68 positive cells in breast tumor development
Source: PubMed Central journal article supplement (PMC5722323; doi:10.1371/journal.pone.0188591), 2017-12-08

# Supplemental Figure 1

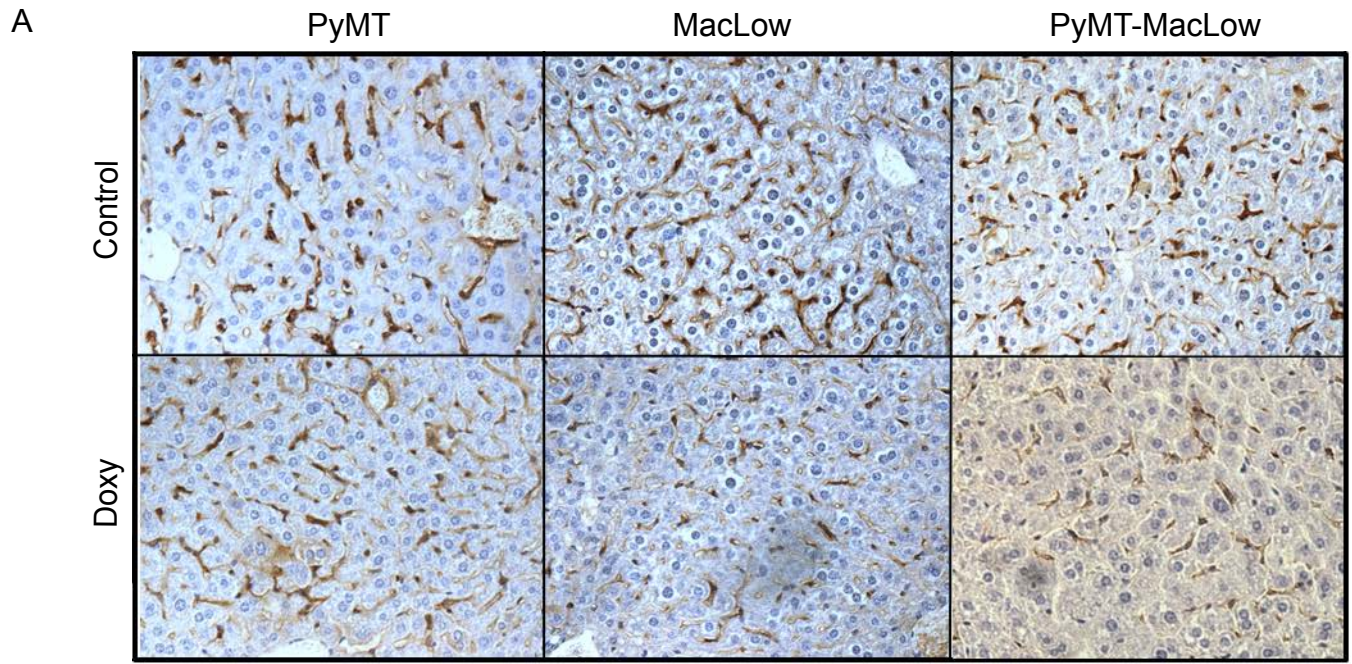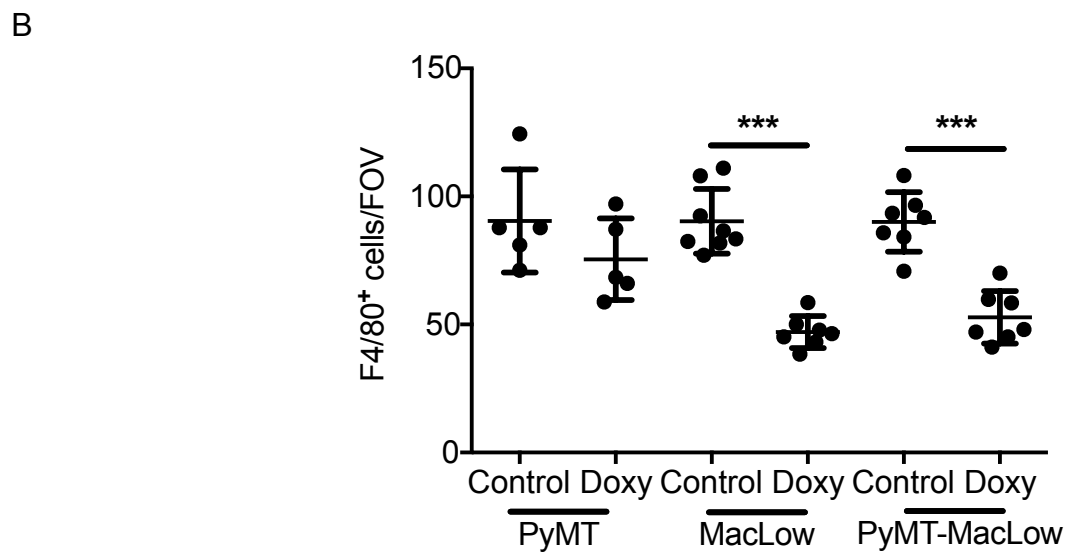

Supplement: pone.0188591.s002.pdf [file pone.0188591.s002.pdf]
